# Supplementary material for: Dynamic helicity inversion in an octahedral cobalt(ii) complex system via solvato-diastereomerism
Source: Royal Society of Chemistry journal article supplement (doi:10.1039/b506130j), 2005-01-01
Supplement: b506130j.pdf [file b506130j.pdf]

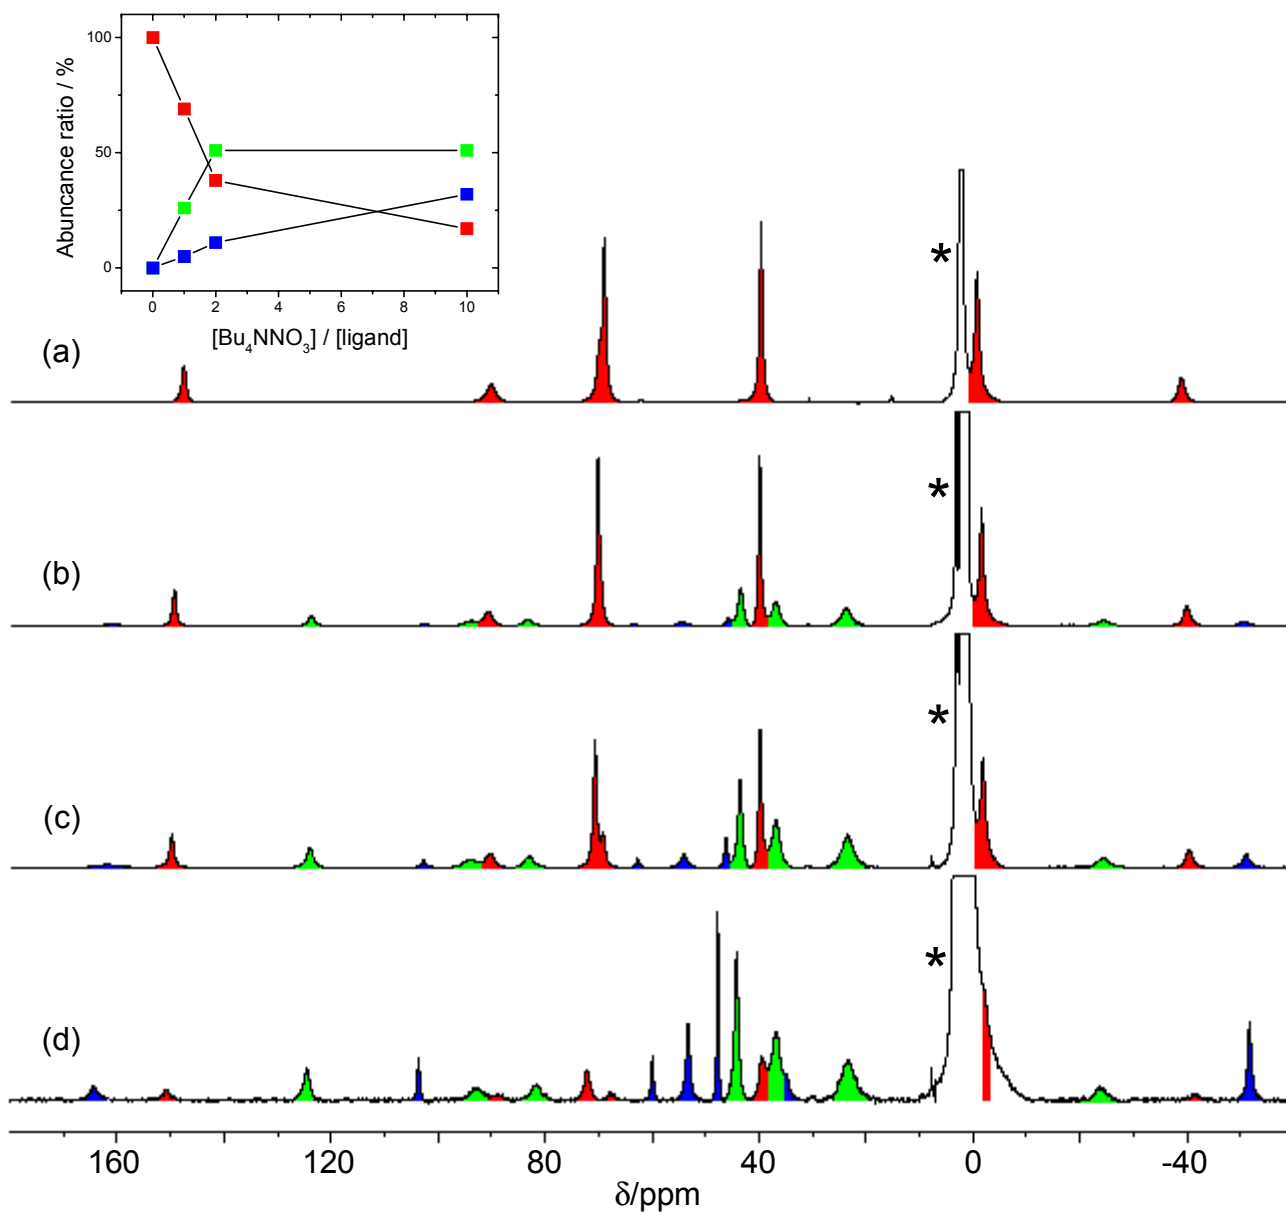

**Fig. S1.** <sup>1</sup>H NMR spectra of 1:1 mixture of **L** and Co(ClO<sub>4</sub>)<sub>2</sub>·6H<sub>2</sub>O in the presence of 0 eq. (a), 1 eq. (b), 2 eq. (c), 10 eq. (d) of Bu<sub>4</sub>NNO<sub>3</sub> in CD<sub>3</sub>CN at room temperature. [L] = [Co(ClO<sub>4</sub>)<sub>2</sub>·6H<sub>2</sub>O] = 5 × 10<sup>-3</sup> mol dm<sup>-3</sup>. \*: Solvent, water and Bu<sub>4</sub>N<sup>+</sup> signals. Inset: abundance ratio of each species in the presence of several amount of Bu<sub>4</sub>NNO<sub>3</sub> in CD<sub>3</sub>CN.
